# Supplementary material for: Safety and Immunogenicity of an Inactivated Recombinant Newcastle Disease Virus Vaccine Expressing SARS-CoV-2 Spike: A Randomised, Comparator-Controlled, Phase 2 Trial
Source: bioRxiv or medRxiv preprint supplement (doi:10.1101/2023.11.30.23299208), 2023-12-01
Supplement: Supplementary file [file media-1.pdf]

**Supplemental Table 1: Antibodies used in the AIM assay**

| Reagent                        | Clone (Source)         | Catalog No  | Dilution |
|--------------------------------|------------------------|-------------|----------|
| CD40 pure- functional grade    | HB14 (Miltenyi Biotec) | 130-094-133 | 1.5:100  |
| CCR7 - BV711                   | G043H7 (Biolegend)     | 353228      | 1:200    |
| Fixable Live/Dead Blue         | (Thermo)               | L23105      | 1:1000   |
| Human FC Block                 | (BD)                   | 564220      | 1:20     |
| CD3 - BUV395                   | UCHT1 (BD)             | 563546      | 1:1000   |
| CD8 - BUV805                   | SK1 (BD)               | 612889      | 1:1000   |
| CD16 - BV510                   | 3G8 (Biolegend)        | 302048      | 1:1000   |
| CD14 - BV510                   | 63D3 (Biolegend)       | 367124      | 1:1000   |
| CD20 - BV510                   | 2H7 (Biolegend)        | 302340      | 1:1000   |
| CD45RA - BV570                 | HI100 (Biolegend)      | 304132      | 1:1000   |
| CD4 - cFluor b548              | SK3 (Cytex)            | R7-20043    | 1:500    |
| PD-1 - BV785                   | EH12.2H7 (Biolegend)   | 329930      | 1:200    |
| CD69 - FITC                    | FN50 (Biolegend)       | 310904      | 1:200    |
| CD40L - PE-Dazzle594           | 24-31 (Biolegend)      | 310840      | 1:200    |
| CD137 - BUV737                 | 4b4-1 (BD)             | 741861      | 1:100    |
| OX40 - APC                     | Ber-Act35 (Biolegend)  | 350008      | 1:100    |
| Brilliant Staining Buffer Plus | (BD)                   | 566385      | 1:10     |

**Supplement Table 2: Number of subjects with unsolicited adverse events with onset during 28 days after vaccination in the safety analysis population**

|                                          | COVIVAC                                 |                                         | VAXZEVRIA<br>(N = 125)<br>n (%)<br>(95% CI*) |
|------------------------------------------|-----------------------------------------|-----------------------------------------|----------------------------------------------|
|                                          | 3 µg<br>(N = 124)<br>n (%)<br>(95% CI*) | 6 µg<br>(N = 125)<br>n (%)<br>(95% CI*) |                                              |
| <b>Number of subjects with:</b>          |                                         |                                         |                                              |
| <b>One or more adverse events</b>        | n= 124                                  | n= 125                                  | n= 125                                       |
|                                          | 36 (29·0%)<br>(21·2-37·9)               | 29 (23·2%)<br>(16·1-31·6)               | 39 (31·2%)<br>(23·2-40·1)                    |
| <b>Vaccine-related adverse events</b>    | n= 124                                  | n= 125                                  | n= 125                                       |
|                                          | 0 (0%)<br>(0·0-2·9)                     | 0 (0%)<br>(0·0-2·9)                     | 0 (0%)<br>(0·0-2·9)                          |
| <b>Withdrawn due to an adverse event</b> | n= 124                                  | n= 125                                  | n= 125                                       |
|                                          | 0 (0%)<br>(0·0-2·9)                     | 0 (0%)<br>(0·0-2·9)                     | 0 (0%)<br>(0·0-2·9)                          |

**Note:** Two-sided 95% confidence intervals (CIs) computed via the Clopper-Pearson method.

**Supplement Table 3: Summary of geometric mean titer (GMT) of NT<sub>50</sub> against SARS-CoV-2 pseudovirus by age group in the full analysis population**

| NT <sub>50</sub> measure                                 |           |                 | COVIVAC                    |                            | VAXZEVRIA<br>(N = 125)    |
|----------------------------------------------------------|-----------|-----------------|----------------------------|----------------------------|---------------------------|
|                                                          |           |                 | 3 µg<br>(N = 124)          | 6 µg<br>(N = 125)          |                           |
| Baseline<br>(D1)                                         | 18-59 yr. | GMT<br>(95% CI) | n = 80                     | n = 79                     | n = 79                    |
|                                                          |           |                 | 5.04<br>(4.96, 5.13)       | 5.00<br>(-)                | 5.23<br>(4.78, 5.72)      |
|                                                          | ≥ 60 yr.  | GMT<br>(95% CI) | n = 40                     | n = 41                     | n = 34                    |
|                                                          |           |                 | 5.00<br>(-)                | 5.14<br>(4.86, 5.45)       | 5.12<br>(4.88, 5.36)      |
| 14 days after<br>the second<br>vaccination<br>(D43)      | 18-59 yr. | GMT<br>(95% CI) | n = 80                     | n = 78                     | n = 79                    |
|                                                          |           |                 | 153.28<br>(124.22, 189.15) | 176.52<br>(141.45, 220.27) | 99.92<br>(80.80, 123.56)  |
|                                                          | ≥ 60 yr.  | GMT<br>(95% CI) | n = 40                     | n = 40                     | n = 35                    |
|                                                          |           |                 | 183.57<br>(133.40, 252.61) | 257.87<br>(181.10, 367.18) | 79.49<br>(55.68, 113.46)  |
| 6 months<br>after the<br>second<br>vaccination<br>(D197) | 18-59 yr. | GMT<br>(95% CI) | n = 78                     | n = 78                     | n = 77                    |
|                                                          |           |                 | 188.05<br>(100.93, 350.38) | 140.99<br>(76.57, 259.61)  | 126.74<br>(77.40, 207.55) |
|                                                          | ≥ 60 yr.  | GMT<br>(95% CI) | n = 38                     | n = 37                     | n = 34                    |
|                                                          |           |                 | 98.94<br>(40.18, 243.62)   | 116.19<br>(47.80, 282.45)  | 50.00<br>(21.18, 118.03)  |

**Note:** - NT<sub>50</sub> GMTs are analyzed from subjects with seronegative anti-S IgG at baseline.

**Supplement Table 4: Percentage of subjects with NT<sub>50</sub> titer sero responses against SARS-CoV-2 pseudovirus as defined by a  $\geq 4$ -fold increase from baseline by age group in the full analysis population**

| NT <sub>50</sub> measure<br>$\geq 4$ -fold<br>(Titer) |               |                   | COVIVAC                |                        | VAXZEVRIA<br>(N = 125) |
|-------------------------------------------------------|---------------|-------------------|------------------------|------------------------|------------------------|
|                                                       |               |                   | 3 $\mu$ g<br>(N = 124) | 6 $\mu$ g<br>(N = 125) |                        |
| 14 days after<br>the second<br>vaccination<br>(D43)   | 18-59 yr.     | n (%)<br>(95% CI) | n = 82                 | n = 83                 | n = 82                 |
|                                                       |               |                   | 73 (89.0%)             | 77 (92.8%)             | 70 (85.4%)             |
|                                                       |               |                   | (80.2-94.9)            | (84.9-97.3)            | (75.8-92.2)            |
|                                                       | $\geq 60$ yr. | n (%)<br>(95% CI) | n = 42                 | n = 40                 | n = 40                 |
|                                                       |               |                   | 41 (97.6%)             | 38 (95.0%)             | 30 (75.0%)             |
|                                                       |               |                   | (87.4-99.9)            | (83.1-99.4)            | (58.8-87.3)            |
| 6 months after<br>the second<br>vaccination<br>(D197) | 18-59 yr.     | n (%)<br>(95% CI) | n = 80                 | n = 82                 | n = 80                 |
|                                                       |               |                   | 44 (55.0%)             | 39 (47.6%)             | 44 (55.0%)             |
|                                                       |               |                   | (43.5-66.2)            | (36.4-58.9)            | (43.5-66.2)            |
|                                                       | $\geq 60$ yr. | n (%)<br>(95% CI) | n = 40                 | n = 37                 | n = 37                 |
|                                                       |               |                   | 17 (42.5%)             | 17 (45.9%)             | 13 (35.1%)             |
|                                                       |               |                   | (27.0-59.1)            | (29.5-63.1)            | (20.2-52.5)            |

**Note:** The 95% CIs are computed via the Clopper-Pearson method. The analysis included subjects regardless of anti S IgG status at baseline.

**Supplement Table 5: Summary of geometric mean titer ratio (GMT Ratio) of NT<sub>50</sub> against SARS-CoV-2 pseudovirus by age group in the full analysis population**

| NT <sub>50</sub> measure<br>GMT ratio (95% CI)  |           | COVIVAC            |                    |                    |
|-------------------------------------------------|-----------|--------------------|--------------------|--------------------|
|                                                 |           | 6 µg / 3 µg        | 3 µg / VAXZEVRIA   | 6 µg / VAXZEVRIA   |
| Baseline (D1)                                   | 18-59 yr. | 0.99 (0.97 , 1.01) | 0.96 (0.88 , 1.05) | 0.96 (0.88 , 1.04) |
|                                                 | ≥ 60 yr.  | 1.03 (0.97 , 1.09) | 0.98 (0.94 , 1.02) | 1.01 (0.93 , 1.08) |
| 14 days after the second<br>vaccination (D43)   | 18-59 yr. | 1.15 (0.85 , 1.56) | 1.53 (1.14 , 2.06) | 1.77 (1.30 , 2.40) |
|                                                 | ≥ 60 yr.  | 1.40 (0.88 , 2.24) | 2.31 (1.45 , 3.69) | 3.24 (1.98 , 5.32) |
| 6 months after the second<br>vaccination (D197) | 18-59 yr. | 0.75 (0.32 , 1.78) | 1.48 (0.67 , 3.27) | 1.11 (0.51 , 2.43) |
|                                                 | ≥ 60 yr.  | 1.17 (0.34 , 4.08) | 1.98 (0.58 , 6.77) | 2.32 (0.69 , 7.85) |

**Note:** NT<sub>50</sub> GMTs are analyzed from subjects with seronegative anti-S IgG at baseline.

**Supplement Table 6: GMT of NT<sub>50</sub> against vaccine-homologous SARS-CoV-2 pseudovirus (PNA) compared to live virus (LVNA) 14 days after the second vaccination (D43), with GMT ratio contrasting COVIVAC to AZ in the full analysis population**

| <b>NT<sub>50</sub> by PNA</b>  |                            |                            |                  |
|--------------------------------|----------------------------|----------------------------|------------------|
| <b>Statistic</b>               | <b>COVIVAC 3</b>           | <b>COVIVAC 6</b>           | <b>VAXZEVRIA</b> |
| N                              | 120                        | 118                        | 114              |
| GMT                            | 162.78                     | 200.72                     | 93.14            |
| 95% CI                         | (136.79, 193.71)           | (166.15, 242.47)           | (77.70, 111.66)  |
| <b>Statistic</b>               | <b>COVIVAC 3/VAXZEVRIA</b> | <b>COVIVAC 6/VAXZEVRIA</b> |                  |
| GMT ratio                      | 1.75                       | 2.15                       |                  |
| 95% CI                         | (1.36, 2.24)               | (1.66, 2.80)               |                  |
| <b>NT<sub>50</sub> by LVNA</b> |                            |                            |                  |
| <b>Statistic</b>               | <b>COVIVAC 3</b>           | <b>COVIVAC 6</b>           | <b>VAXZEVRIA</b> |
| N                              | 120                        | 117                        | 114              |
| GMT                            | 45.84                      | 70.35                      | 29.84            |
| 95% CI                         | (35.82, 58.66)             | (55.91, 88.53)             | (23.74, 37.52)   |
| <b>Statistic</b>               | <b>COVIVAC 3/VAXZEVRIA</b> | <b>COVIVAC 6/VAXZEVRIA</b> |                  |
| GMT ratio                      | 1.54                       | 2.36                       |                  |
| 95% CI                         | (1.10, 2.15)               | (1.71, 3.26)               |                  |

**Note:** NT<sub>50</sub> GMTs are analyzed from subjects with seronegative anti-S IgG at baseline.

**Supplement Table 7: Summary of geometric mean concentration (GMC) in BAU/mL of anti-S IgG assessed by ELISA by age group in the full analysis population**

| Anti-S IgG measure<br>(BAU/mL)                           |           |                 | COVIVAC                     |                             | VAXZEVRIA<br>(N = 125)      |
|----------------------------------------------------------|-----------|-----------------|-----------------------------|-----------------------------|-----------------------------|
|                                                          |           |                 | 3 µg<br>(N = 124)           | 6 µg<br>(N = 125)           |                             |
| Baseline (D1)                                            | 18-59 yr. | GMC<br>(95% CI) | n = 80                      | n = 79                      | n = 80                      |
|                                                          |           |                 | 3.15 (-)                    | 3.15 (-)                    | 3.15 (-)                    |
|                                                          | ≥ 60 yr.  | GMC<br>(95% CI) | n = 40                      | n = 41                      | n = 35                      |
|                                                          |           |                 | 3.15 (-)                    | 3.15 (-)                    | 3.15 (-)                    |
| 14 days after<br>the second<br>vaccination<br>(D43)      | 18-59 yr. | GMC<br>(95% CI) | n = 80                      | n = 78                      | n = 79                      |
|                                                          |           |                 | 139.60<br>(112.48 , 173.27) | 155.46<br>(123.39 , 195.87) | 366.41<br>(306.59 , 437.91) |
|                                                          | ≥ 60 yr.  | GMC<br>(95% CI) | n = 40                      | n = 40                      | n = 35                      |
|                                                          |           |                 | 146.65<br>(104.62 , 205.56) | 224.91<br>(155.86 , 324.57) | 312.37<br>(211.23 , 461.93) |
| 6 months<br>after the<br>second<br>vaccination<br>(D197) | 18-59 yr. | GMC<br>(95% CI) | n = 78                      | n = 78                      | n = 77                      |
|                                                          |           |                 | 166.99<br>(87.31 , 319.39)  | 124.64<br>(65.78 , 236.19)  | 277.29<br>(164.97 , 466.07) |
|                                                          | ≥ 60 yr.  | GMC<br>(95% CI) | n = 40                      | n = 39                      | n = 34                      |
|                                                          |           |                 | 78.28<br>(30.39 , 201.61)   | 89.87<br>(35.08 , 230.22)   | 107.22<br>(42.89 , 268.03)  |

**Note:** GMCs are analyzed from subjects with seronegative anti-S IgG at baseline.

**Supplement Table 8: Summary of geometric mean concentration ratio (GMC Ratio) of anti-S IgG assessed by ELISA by age group in the full analysis population**

| Anti-S IgG<br>GMC ratio (95% CI)                |           | COVIVAC            |                     |                     |
|-------------------------------------------------|-----------|--------------------|---------------------|---------------------|
|                                                 |           | 6 µg / 3 µg        | 3 µg /<br>VAXZEVRIA | 6 µg /<br>VAXZEVRIA |
| Baseline (D1)                                   | 18-59 yr. | 1.00 (1.00 , 1.00) | 1.00 (1.00 , 1.00)  | 1.00 (1.00 , 1.00)  |
|                                                 | ≥ 60 yr.  | 1.00 (1.00 , 1.00) | 1.00 (1.00 , 1.00)  | 1.00 (1.00 , 1.00)  |
| 14 days after the second<br>vaccination (D43)   | 18-59 yr. | 1.11 (0.81 , 1.52) | 0.38 (0.29 , 0.50)  | 0.42 (0.32 , 0.57)  |
|                                                 | ≥ 60 yr.  | 1.53 (0.94 , 2.51) | 0.47 (0.28 , 0.78)  | 0.72 (0.42 , 1.22)  |
| 6 months after the second<br>vaccination (D197) | 18-59 yr. | 0.75 (0.30 , 1.84) | 0.60 (0.26 , 1.37)  | 0.45 (0.20 , 1.02)  |
|                                                 | ≥ 60 yr.  | 1.15 (0.31 , 4.27) | 0.73 (0.20 , 2.70)  | 0.84 (0.23 , 3.07)  |

**Note:** Anti-S IgG GMCs ratio are analyzed from subjects with seronegative anti-S IgG at baseline.

**Supplement Table 9: Summary of geometric mean fold rise (GMFR) from baseline of anti-S IgG concentration assessed by ELISA by age group in the full analysis population**

| Anti-S IgG measure                           |           |                             | COVIVAC                   |                          | VAXZEVRIA<br>(N = 125)     |
|----------------------------------------------|-----------|-----------------------------|---------------------------|--------------------------|----------------------------|
|                                              |           |                             | 3 µg<br>(N = 124)         | 6 µg<br>(N = 125)        |                            |
| 14 days after the second vaccination (D43)   | 18-59 yr. | GMFR from baseline (95% CI) | n = 81                    | n = 82                   | n = 83                     |
|                                              |           |                             | 45·18<br>(36·37 , 56·12)  | 46·55<br>(37·08 , 58·43) | 108·47<br>(89·94 , 130·83) |
|                                              | ≥ 60 yr.  | GMFR from baseline (95% CI) | n = 42                    | n = 41                   | n = 41                     |
|                                              |           |                             | 45·03<br>(32·46 , 62·45)  | 69·32<br>(48·25 , 99·59) | 87·13<br>(60·32 , 125·84)  |
| 6 months after the second vaccination (D197) | 18-59 yr. | GMFR from baseline (95% CI) | n = 79                    | n = 83                   | n = 81                     |
|                                              |           |                             | 54·93<br>(28·85 , 104·60) | 39·87<br>(21·68 , 73·30) | 78·74<br>(47·13 , 131·54)  |
|                                              | ≥ 60 yr.  | GMFR from baseline (95% CI) | n = 42                    | n = 39                   | n = 40                     |
|                                              |           |                             | 22·64<br>(9·12 , 56·18)   | 28·52<br>(11·13 , 73·06) | 35·38<br>(15·15 , 82·63)   |

**Note:** Geometric Mean Fold Rise (GMFR) is the geometric mean of the ratios of post-vaccination to the pre-first vaccination at D1 (baseline).
